# Supplementary material for: Anti-breast tumor activity of Eclipta extract in-vitro and in-vivo: novel evidence of endoplasmic reticulum specific localization of Hsp60 during apoptosis
Source: PubMed Central journal article supplement (PMC4682077; doi:10.1038/srep18457), 2015-12-17
Supplement: srep18457-s1.pdf [file srep18457-s1.pdf]

**Anti-breast tumor activity of Eclipta extract *in-vitro* and *in-vivo*: novel evidence of endoplasmic reticulum specific localization of Hsp60 during apoptosis**

Rakesh K Arya, Akhilesh Singh, Navneet K Yadav, Srikanth H Cheruvu, Zakir Hossain, Sanjeev Meena, Shrankhla Maheshwari, Anup K Singh, Uzma Shahab, Chetan Sharma, Kavita Singh, Tadigoppula Narender, Kalyan Mitra, Kamal R Arya, Rama K Singh, Jiaur R Gayen, Dipak Datta

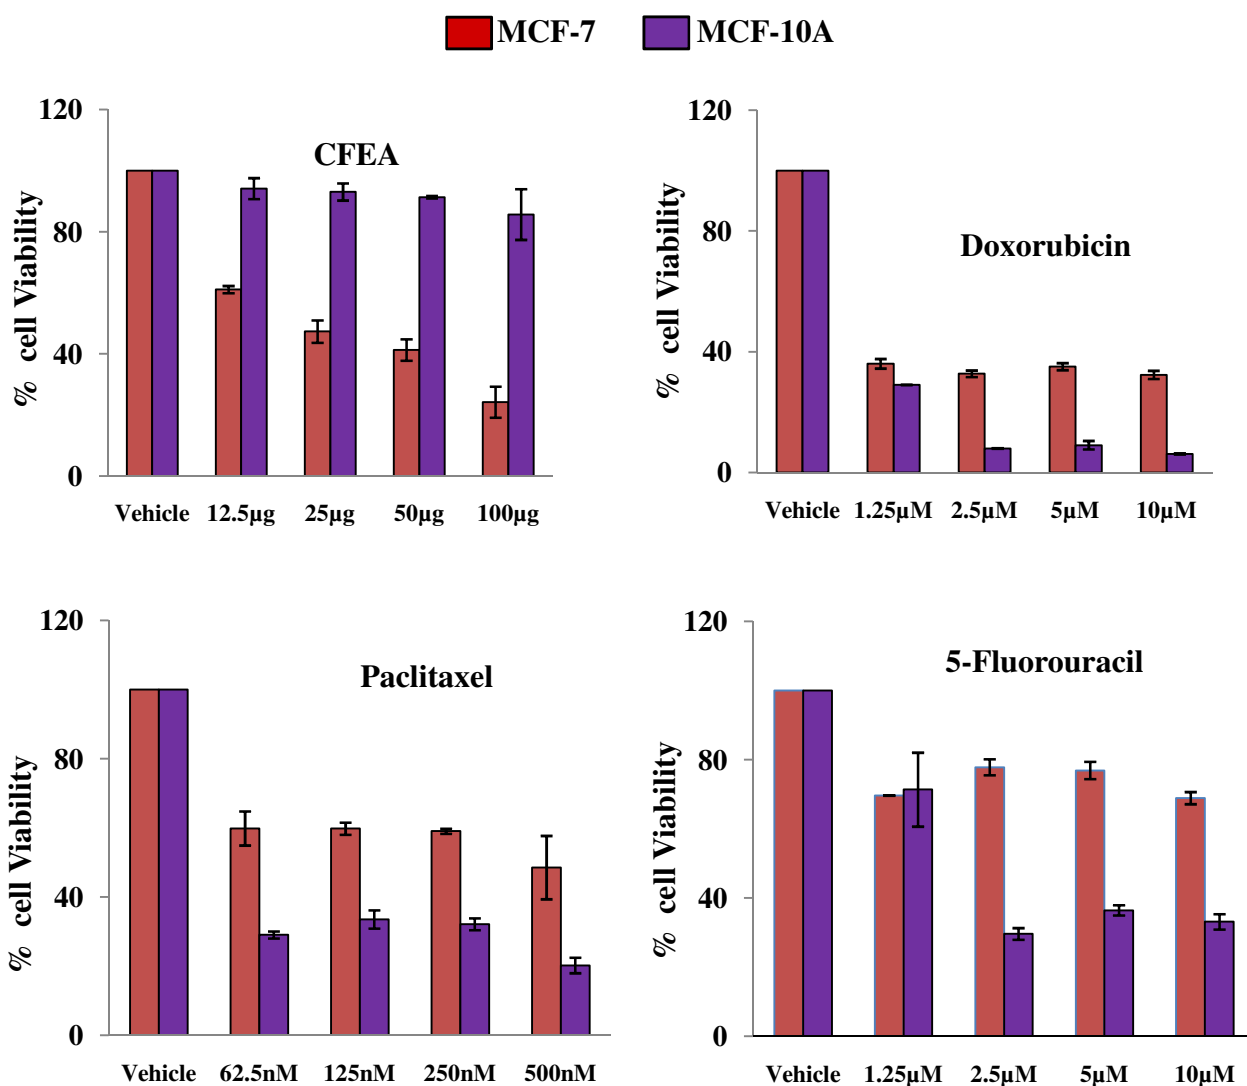

**Supplementary Information 1. CFEA selectively inhibits breast tumor cell growth**

MCF-7 (red bar) and MCF-10A (violet bar) cells were treated with different doses of CFEA and FDA approved standard anticancer drugs Doxorubicin, Paclitaxel, and 5-Fluorouracil for 48 hours and percent cell viability was assessed by SRB assay. Columns, average of quadriplate readings of samples; error bars,  $\pm$  S.D.

## Supplemental Information

| <b>Coordinate</b> | <b>Target/Control</b>           | <b>Coordinate</b> | <b>Target/Control</b>    |
|-------------------|---------------------------------|-------------------|--------------------------|
| <b>A1, A2</b>     | <b>Positive Control</b>         | <b>C13, C14</b>   | <b>HO-2</b>              |
| <b>A23, A24</b>   | <b>Positive Control</b>         | <b>C15, C16</b>   | <b>HSP27</b>             |
| <b>B1, B2</b>     | <b>Bad</b>                      | <b>C17, C18</b>   | <b>HSP60</b>             |
| <b>B3, B4</b>     | <b>Bax</b>                      | <b>C19, C20</b>   | <b>HSP70</b>             |
| <b>B5, B6</b>     | <b>Bcl-2</b>                    | <b>C21, C22</b>   | <b>HTRA2/Omi</b>         |
| <b>B7, B8</b>     | <b>Bcl-x</b>                    | <b>C23, C24</b>   | <b>Livin</b>             |
| <b>B9, B10</b>    | <b>Pro-Caspase-3</b>            | <b>D1, D2</b>     | <b>PON2</b>              |
| <b>B11, B12</b>   | <b>Cleaved Caspase-3</b>        | <b>D3, D4</b>     | <b>p21/CDNK1A</b>        |
| <b>B13, B14</b>   | <b>Catalase</b>                 | <b>D5, D6</b>     | <b>p27/Kip1</b>          |
| <b>B15, B16</b>   | <b>cIAP-1</b>                   | <b>D7, D8</b>     | <b>Phospho-p53(S15)</b>  |
| <b>B17, B18</b>   | <b>cIAP-2</b>                   | <b>D9, D10</b>    | <b>Phospho-p53(S46)</b>  |
| <b>B19, B20</b>   | <b>Claspain</b>                 | <b>D11, D12</b>   | <b>Phospho-p53(S392)</b> |
| <b>B21, B22</b>   | <b>Clusterin</b>                | <b>D13, D14</b>   | <b>Phospho-Rad17</b>     |
| <b>B23, B24</b>   | <b>Cytochrome c</b>             | <b>D15, D16</b>   | <b>SMAC/Diablo</b>       |
| <b>C1, C2</b>     | <b>TRAIL R1/DR4</b>             | <b>D17, D18</b>   | <b>Survivin</b>          |
| <b>C3, C4</b>     | <b>TRAIL R2/DR5</b>             | <b>D19, D20</b>   | <b>TNFR1/TNFRSF1A</b>    |
| <b>C5, C6</b>     | <b>FADD</b>                     | <b>D21, D22</b>   | <b>XIAP</b>              |
| <b>C7, C8</b>     | <b>Fas/TNFSF6</b>               | <b>D23, D24</b>   | <b>PBS (-ve Control)</b> |
| <b>C9, C10</b>    | <b>HIF-1<math>\alpha</math></b> | <b>E1, E2</b>     | <b>Positive Control</b>  |
| <b>C11, C12</b>   | <b>HO-1</b>                     |                   |                          |

**Supplementary Information 2.** Proteome profiler apoptotic array spot coordinates for target proteins in duplicates were enlisted.

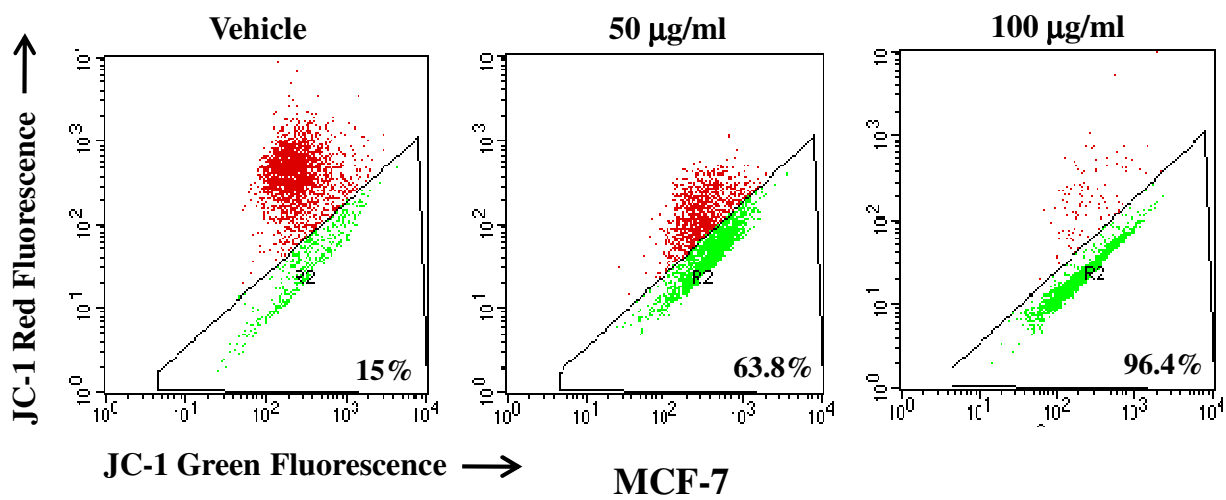

**Supplementary Information 3.** MCF-7 cells treated with either vehicle or CFEA at different concentrations for 24 hours, were stained with JC-1 dye and the loss of mitochondrial membrane potential was assessed by flow cytometry. Representative of three independent experiments.
